# Supplementary material for: A novel automated morphological analysis of Iba1+ microglia using a deep learning assisted model
Source: Frontiers journal article supplement (doi:10.3389/fncel.2022.944875), 2022-09-15
Supplement: Data_Sheet_1.ZIP [file Data_Sheet_1.ZIP]

## Sheet: Sheet1
image name	treatment info
Iba1_RO1_1B_A-00	PBS
Iba1_RO1_1B_H-03	PFF
Iba1_RO1_1B_I-04	PFF
Iba1_RO1_1B_K-03	PBS
