# Supplementary material for: A novel automated morphological analysis of Iba1+ microglia using a deep learning assisted model
Source: Frontiers journal article supplement (doi:10.3389/fncel.2022.944875), 2022-09-15
Supplement: Data_Sheet_1.ZIP [file ROI_Example_key_iba1_V2_test.xlsx]

## Sheet: Sheet1
letters found in ROI label used to code brain region	Brain region
AON_I	Anterior olfactory nucleus ipsilateral
AON_N	Anterior olfactory nucleus contralateral
APCX_I	Anterior piriform ipsilateral
APCX_N	Anterior piriform contralateral
OB_I	Olfactory bulb ipsilateral
OB_N	Olfactory bulb contralateral
PCX_I	Piriform ipsilateral
PCX_N	Piriform contralateral
