# Supplementary material for: A novel automated morphological analysis of Iba1+ microglia using a deep learning assisted model
Source: PubMed Central journal article supplement (PMC9520629; doi:10.3389/fncel.2022.944875), 2022-09-15
Supplement: Table_1.pdf [file Table_1.pdf]

**Supplementary Table 1 – acquisition duration data**

| <b>Method</b>  | <b>Date</b> | <b>Start time</b> | <b>Stop time</b> | <b>Step</b>               | <b>Total time</b> | <b>Figure reference</b> |
|----------------|-------------|-------------------|------------------|---------------------------|-------------------|-------------------------|
| <b>MATLAB</b>  | 03.29.21    | 10:00             | 12:30            | Brightfield imaging       | 2.5hrs            | Fig 1a                  |
| <b>Aiforia</b> | 11.01.21    | 18:33             | 19:35            | ROI annotation            | 1hr               | Fig 1a                  |
| <b>MATLAB</b>  | 03.30.21    | 13:30             | 15:00            | Analysis / Quantification | 1.5hrs            | Fig 1a                  |
| <b>Aiforia</b> | 11.01.21    | 19:37             | 19:43            | Analysis / Quantification | 5min              | Fig 1a                  |
| <b>MATLAB</b>  | 03.29.21    | 13:30             | 14:00            | Analysis / Quantification | 30min             | Fig 1b                  |
| <b>Aiforia</b> | 4.22.21     | 11:31             | 11:35            | ROI annotation            | 4min              | Fig 1b                  |
| <b>Aiforia</b> | 4.22.21     | 11:37             | 11:37            | Analysis / Quantification | <1min             | Fig 1b                  |

**Supplementary Table 1. Method step-specific comparison of dataset acquisition duration.** (**Method**) Identifying the use of either MATLAB or Aiforia®. (**Date**) the date on which the Step was performed using US calendar notation (mm-dd-yy). (**Start time / Stop time**) the time when each Step began and ended respectively using 24-hour clock. (**Step**) a brief description of the action performed in the process of acquiring data. (**Total time**) the duration of elapsed time between when each step began and ended. (**Figure reference**) identifies the figure in the main text for which the details are provided.
